# Supplementary material
Source: ML conference proceedings conference paper supplement (https://proceedings.neurips.cc/paper_files/paper/2019/hash/d4cd91e80f36f8f3103617ded9128560-Abstract.html)
Supplement: Supplementary file 2 [file d4cd91e80f36f8f3103617ded9128560-Supplemental.zip]

Archive with 1 entries (1 files):
- dimension-free-lp_with_appendix.pdf
